# Supplementary material for: Synthesis and luminescence properties of a trinucleotide–europium(III) complex conjugate
Source: Royal Society of Chemistry journal article supplement (doi:10.1039/b902643f), 2009-01-01
Supplement: b902643f.pdf [file b902643f.pdf]

Supplementary data for:

## Synthesis and Luminescence Properties of a Trinucleotide-Europium(III) Complex Conjugate

Jean-Marc Escudier,<sup>a\*</sup> Christelle Dupouy<sup>a</sup>, Matthew A. Fountain<sup>b</sup>, Imee Marie A. del Mundo<sup>c</sup>, Erin M. Jacklin<sup>c</sup> and Janet R. Morrow<sup>c\*</sup>

<sup>a</sup>Université Paul Sabatier, 118 Route de Narbonne, 31062 Toulouse Cedex 4, France,

<sup>b</sup>Department of Chemistry, State University of New York, at Fredonia, Fredonia, NY 14063.

<sup>c</sup>Department of Chemistry, University at Buffalo, State University of New York, Buffalo, NY 14260-3000.

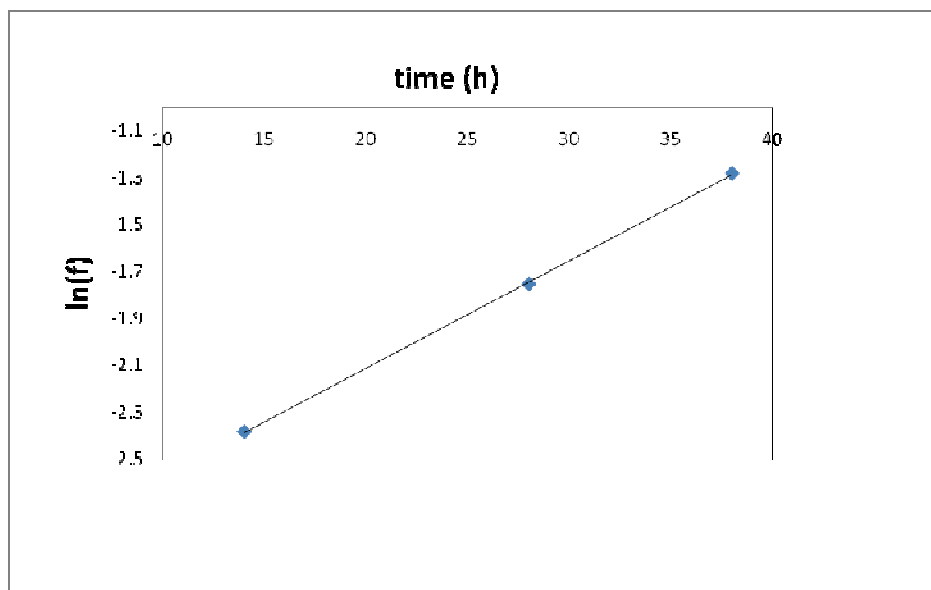

Figure S1. Plot of the natural log of the fraction of conversion to product (f) versus time for the incubation of Eu(2) at 25 °C, 10 mM HEPES pH 7.5, 100 mM NaCl. The data are fit to a line to give a first-order rate constant of  $1.3 \times 10^{-5} \text{ s}^{-1}$ .
